# Supplementary material for: Nifurtimox versus benznidazole or placebo for asymptomatic Trypanosoma cruzi infection (Equivalence of Usual Interventions for Trypanosomiasis - EQUITY): study protocol for a randomised controlled trial
Source: PubMed Central journal article supplement (PMC6631895; doi:10.1186/s13063-019-3423-3), 2019-07-15
Supplement: 13063_2019_3423_MOESM2_ESM.pdf [file 13063_2019_3423_MOESM2_ESM.pdf]

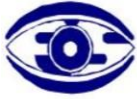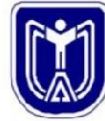

---

**THE UNDERSIGNED PRESIDENT OF THE ETHICS BOARD FOR CLINICAL  
RESEARCH AT THE FUNDACION OFTALMOLOGICA DE SANTANDER FOSCAL**

**certifies that:**

The board (*Comité de Ética en Investigación de la Fundación Oftalmologica de Santander CEI- FOSCAL*) reviewed, discussed and approved the research protocol: “Cardiovascular Health Investigation and Collaboration from Countries of America to Assess the Markers and Outcomes of Chagas disease (CHICAMOCHA 3) – EQUITY (Equivalence of Usual Interventions for Trypanosomiasis”. The approval was given and registered in the minutes of the board meeting on November 21<sup>st</sup>, 2014.

This certificate is issued on October 24, 2018 for the purpose of submitting a manuscript to an international medical journal.

**CARLOS PAREDES GOMEZ**  
**Board President CEI- FOSCAL**
